# Supplementary material for: SMSSVD: SubMatrix Selection Singular Value Decomposition
Source: PubMed Central journal article supplement (PMC6361234; doi:10.1093/bioinformatics/bty566), 2018-07-13
Supplement: bty566_supplementary_materials.pdf [file bty566_supplementary_materials.pdf]

# Supplementary Materials

SMSSVD – SubMatrix Selection Singular Value Decomposition

## Proofs and Comments

**Theorem 1** (Decomposition Theorem). *Let  $X|_{\Pi} : \Pi \rightarrow X(\Pi)$  be the restriction of a linear map  $X : \mathbb{R}^N \rightarrow \mathbb{R}^P$  to a  $d$ -dimensional subspace  $\Pi \subset \mathbb{R}^N$  such that  $\Pi \perp \ker X$ . Furthermore, let  $U\Sigma V^T = \sum_{i=1}^d \sigma_i U_i V_i^T$  be the singular value decomposition of  $X|_{\Pi}$ . Then*

1.  $V_i \perp \ker X, \forall i$ .
2.  $U_i \perp \text{coker } X, \forall i$ .
3.  $XV = U\Sigma$ .
4.  $U^T X = \Sigma V^T + U^T X(I - VV^T)$ .
5.  $(I - UU^T)X(I - VV^T) = (I - UU^T)X$ .
6.  $\text{rank}(X) = d + \text{rank}((I - UU^T)X)$ .

*Remark. In the statement of the theorem and in the proof below, we consider all vectors to belong to the full-dimensional spaces. In particular, we extend all vectors in subspaces of the full spaces with zero in the orthogonal complements.*

*Proof.* 1. The columns of  $V$  are an orthonormal basis of  $\Pi$  and thus orthogonal to  $\ker X$ . 2. The columns of  $U$  are an orthonormal basis of  $X(\Pi)$  and  $X(\Pi) \perp \text{coker } X$ . 3.  $XV = X|_{\Pi}V = U\Sigma V^T V = U\Sigma$ . 4. Using 3 we get

$$\begin{aligned} U^T X &= U^T X V V^T + U^T X (I - V V^T) \\ &= \Sigma V^T + U^T X (I - V V^T). \end{aligned}$$

5. The statement follows from  $(I - UU^T)XV = (I - UU^T)U\Sigma = \mathbf{0}$ , where we have used that  $U^T U = I$ . 6. Let  $Y := X(\Pi)$  and  $Z := \text{im } X / X(\Pi)$  be the parts of the decomposition  $\text{im } X = Y \oplus Z$ , which is possible since  $Y \subset \text{im } X$ . The linear map  $(I - UU^T)$  is orthogonal projection onto  $X(\Pi)^\perp$  and thus maps  $Y \rightarrow 0$  and  $Z \rightarrow Z$ . Since  $\text{rank } A = \dim(\text{im } A)$ , it follows immediately that  $\text{rank}(I - UU^T)X = \dim Z$  and that  $\text{rank } X = \dim Y + \dim Z = d + \dim Z$ .  $\square$

**Theorem 2** (Selection-Expansion Theorem). *Take a linear map  $S : \mathbb{R}^L \rightarrow \mathbb{R}^P$  and an integer  $d$  such that  $\text{rank } S^T X \geq d$  and let  $\tilde{U}\tilde{\Sigma}\tilde{V}^T$  be the rank  $d$  truncated SVD of  $S^T X$ . Furthermore let  $\Pi$  be the subspace spanned by the columns of  $\tilde{V}$  and let  $U\Sigma V^T$  be the SVD of  $X|_{\Pi}$ . Then*

1.  $\Pi \perp \ker X$ .
2.  $S^T U \Sigma V^T = \tilde{U} \tilde{\Sigma} \tilde{V}^T$ .
3.  $\{V_{\cdot 1}, V_{\cdot 2}, \dots, V_{\cdot d}\}$  and  $\{\tilde{V}_{\cdot 1}, \tilde{V}_{\cdot 2}, \dots, \tilde{V}_{\cdot d}\}$  are orthonormal bases of  $\Pi$ .
4.  $\{S^T U_{\cdot 1}, S^T U_{\cdot 2}, \dots, S^T U_{\cdot d}\}$  and  $\{\tilde{U}_{\cdot 1}, \tilde{U}_{\cdot 2}, \dots, \tilde{U}_{\cdot d}\}$  are bases of  $S^T X(\Pi)$ .
5.  $\|\Sigma\|_F \geq \frac{\|\tilde{\Sigma}\|_F}{\|\tilde{S}\|_2}$ .

$$6. U^T X = \Sigma V^T + U^T(I - SS^T)X(I - VV^T).$$

*Proof.* 1. The columns of  $\tilde{V}$  are orthogonal to  $\ker S^T X \supset \ker X$ . 2.  $S^T U \Sigma V^T = S^T X|_{\Pi} = (S^T X)|_{\Pi} = \tilde{U} \tilde{\Sigma} \tilde{V}^T$ . 3. Follows immediately from the definitions. 4.  $\{\tilde{U}_i\}_{i=1}^d$  is a basis of  $S^T X(\Pi)$ . By property 2,  $\tilde{U} = S^T U \Sigma V^T \tilde{V} \tilde{\Sigma}^{-1}$ , showing that  $\{S^T U_i\}_{i=1}^d$  span  $\{\tilde{U}_i\}_{i=1}^d$ . Finally, since  $U$  and  $\tilde{U}$  have the same rank,  $\{U_i\}_{i=1}^d$  is also a basis of  $S^T X(\Pi)$ . 5. For general matrices  $A$  and  $B$ , consider  $A$  acting on each column of  $B$ . We get

$$\|AB\|_F^2 = \sum_i \|AB_{\cdot i}\|_2^2 \leq \sum_i \|A\|_2^2 \|B_{\cdot i}\|_2^2 = \|A\|_2^2 \|B\|_F^2.$$

The result now follows from property 2, with  $A = S^T$  and  $B = U \Sigma V^T$ , since  $\|AB\|_F = \|\tilde{U} \tilde{\Sigma} \tilde{V}^T\|_F = \|\tilde{\Sigma}\|_F$  and  $\|B\|_F = \|\Sigma\|_F$ . 6. From Theorem 1, property 4, we get  $U^T X = \Sigma V^T + U^T X(I - VV^T)$ . It remains to show that  $U^T S S^T X(I - VV^T) = \mathbf{0}$ . By property 4, there exists a matrix  $Z$  such that  $S^T U = \tilde{U} Z$  and

$$\begin{aligned} U^T S S^T X(I - VV^T) &= Z^T \tilde{U}^T S^T X(I - VV^T) \\ &= Z^T \tilde{\Sigma} \tilde{V}^T (I - \tilde{V} \tilde{V}^T) = \mathbf{0}, \end{aligned}$$

where  $VV^T = \tilde{V} \tilde{V}^T$  because of property 3.  $\square$

Even if the SMSSVD algorithm is run until  $X_k = 0$ ,  $U \Sigma V^T \neq X$  in general, with equality iff the residual  $U_k^T X_k (I - V_k V_k^T) = 0$  for all  $k$ . Indeed, if  $U \Sigma V^T = X$ , then the SMSSVD of  $X$  coincides with the SVD of  $X$  (up to permutation of the singular values and corresponding singular vectors). If instead  $U \Sigma V^T \neq X$ , let's consider the residual term  $U^T X - \Sigma V^T$ , which corresponds to what is removed by the noise reduction. By the 'Signal Removal' step in the SMSSVD algorithm,

$$X_n = (I - U_{n-1} U_{n-1}^T)(I - U_{n-2} U_{n-2}^T) \cdots (I - U_1 U_1^T) X.$$

Hence,  $U_k^T X = U_k^T X_k$  by Theorem 1, property 4, and the residual takes the form

$$U^T X - \Sigma V^T = \begin{pmatrix} U_1^T (I - S_1 S_1^T) X_1 (I - V_1 V_1^T) \\ U_2^T (I - S_2 S_2^T) X_2 (I - V_2 V_2^T) \\ \vdots \\ U_n^T (I - S_n S_n^T) X_n (I - V_n V_n^T) \end{pmatrix}.$$

## Supplementary Figures

Color key for Supplementary Figures 1 and 2:

Below the diagonal, samples are colored by the annotation 'xml\_gender', **Female** and **Male**.

Above the diagonal, samples are colored by the annotation 'gdc\_cases\_tissue\_source\_site\_project': **Mesothelioma**, Kidney renal clear cell carcinoma, Rectum adenocarcinoma, **Bladder Urothelial Carcinoma**, **Adrenocortical carcinoma**, **Lung squamous cell carcinoma**, Pheochromocytoma and Paraganglioma, **Kidney Chromophobe**, **Uterine Corpus Endometrial Carcinoma**, **Sarcoma**, Uveal Melanoma, Head and Neck squamous cell carcinoma, **Thyroid carcinoma**, Colon adenocarcinoma, **Stomach adenocarcinoma**, Skin Cutaneous Melanoma, **Kidney renal papillary cell carcinoma**, Cervical squamous cell carcinoma and endocervical adenocarcinoma, Lymphoid Neoplasm Diffuse Large B-cell Lymphoma, Breast invasive carcinoma, Uterine Carcinosarcoma, **Esophageal carcinoma**, **Prostate adenocarcinoma**, **Lung adenocarcinoma**, **Cholangiocarcinoma**, **Liver hepatocellular carcinoma**, **Ovarian serous cystadenocarcinoma**, **Pancreatic adenocarcinoma**, **Brain Lower Grade Glioma** and **Glioblastoma multiforme**.

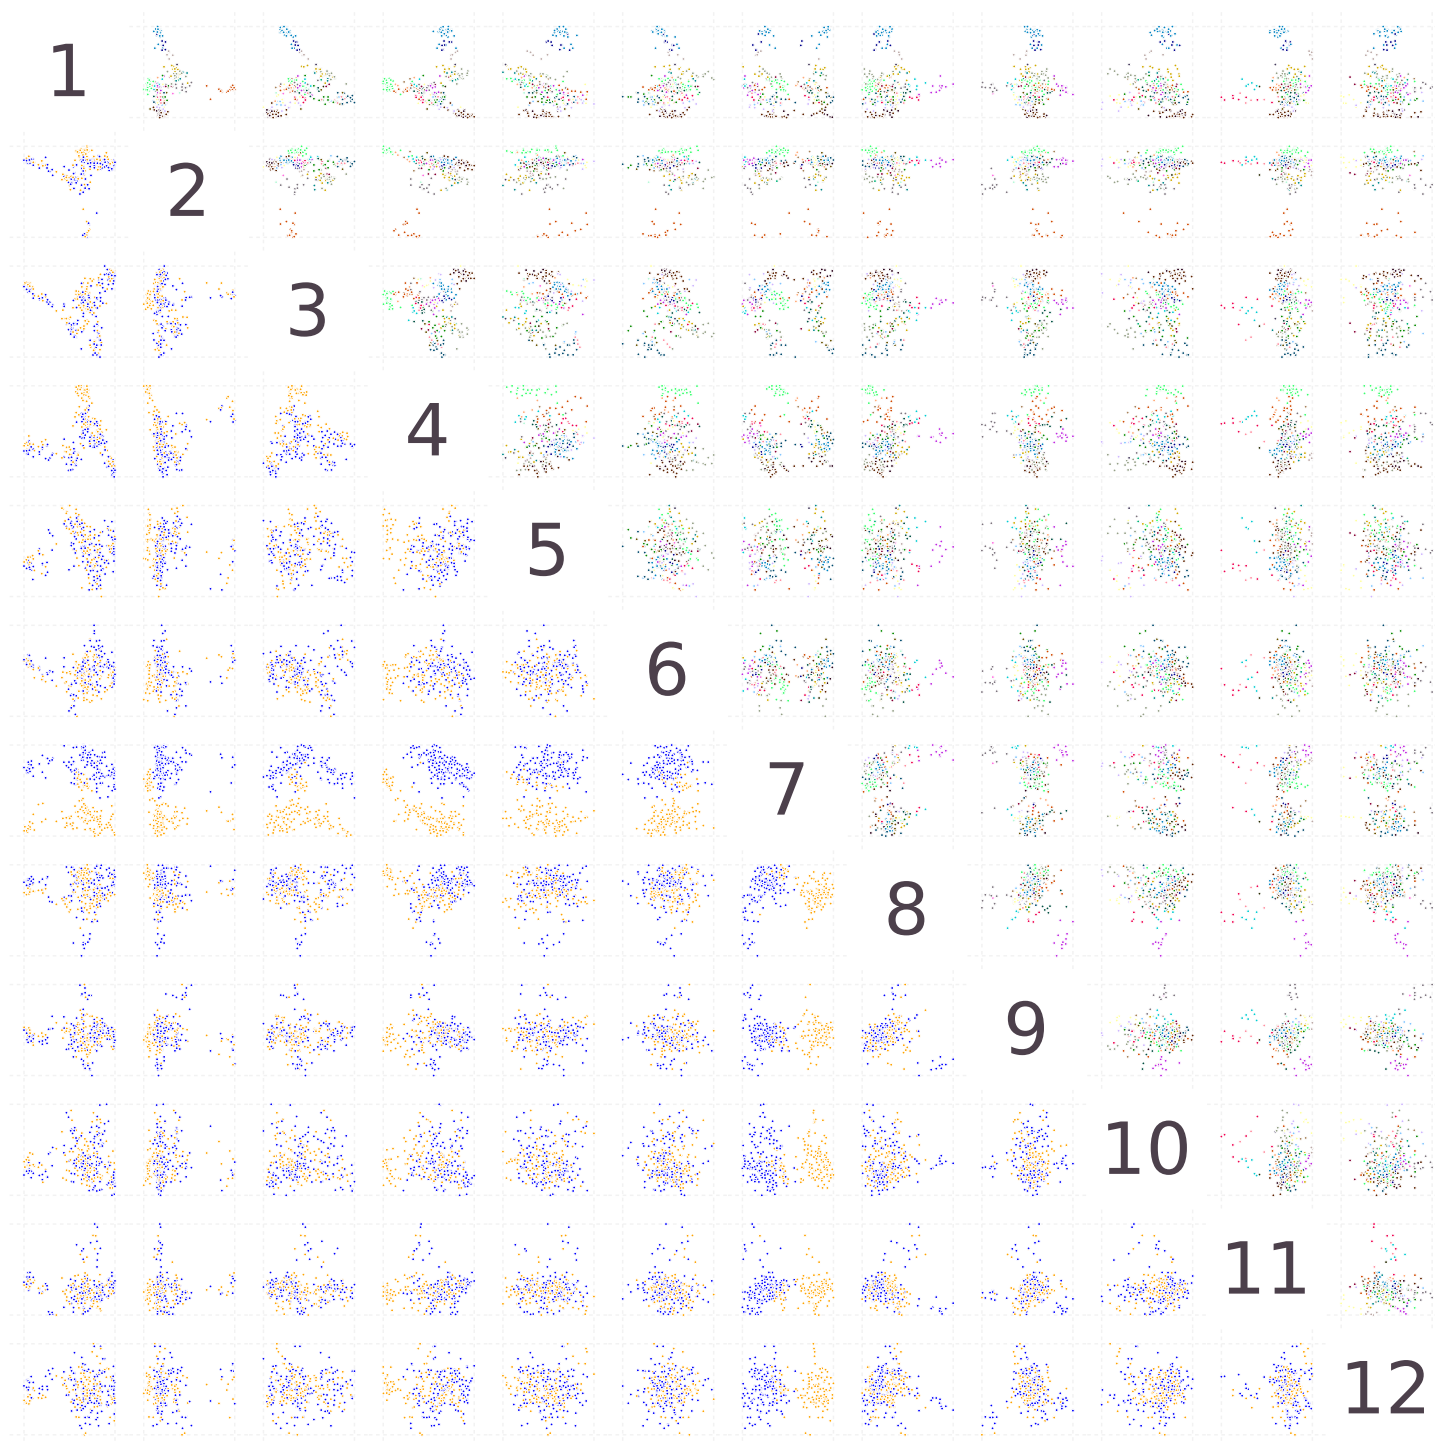

Supplementary Figure 1: SMSSVD of the TCGA data set. Below the diagonal, samples are colored by 'xml\_gender', and above the diagonal, samples are colored by 'gdc\_cases.tissue\_source\_site\_project'. (Color key given above.)

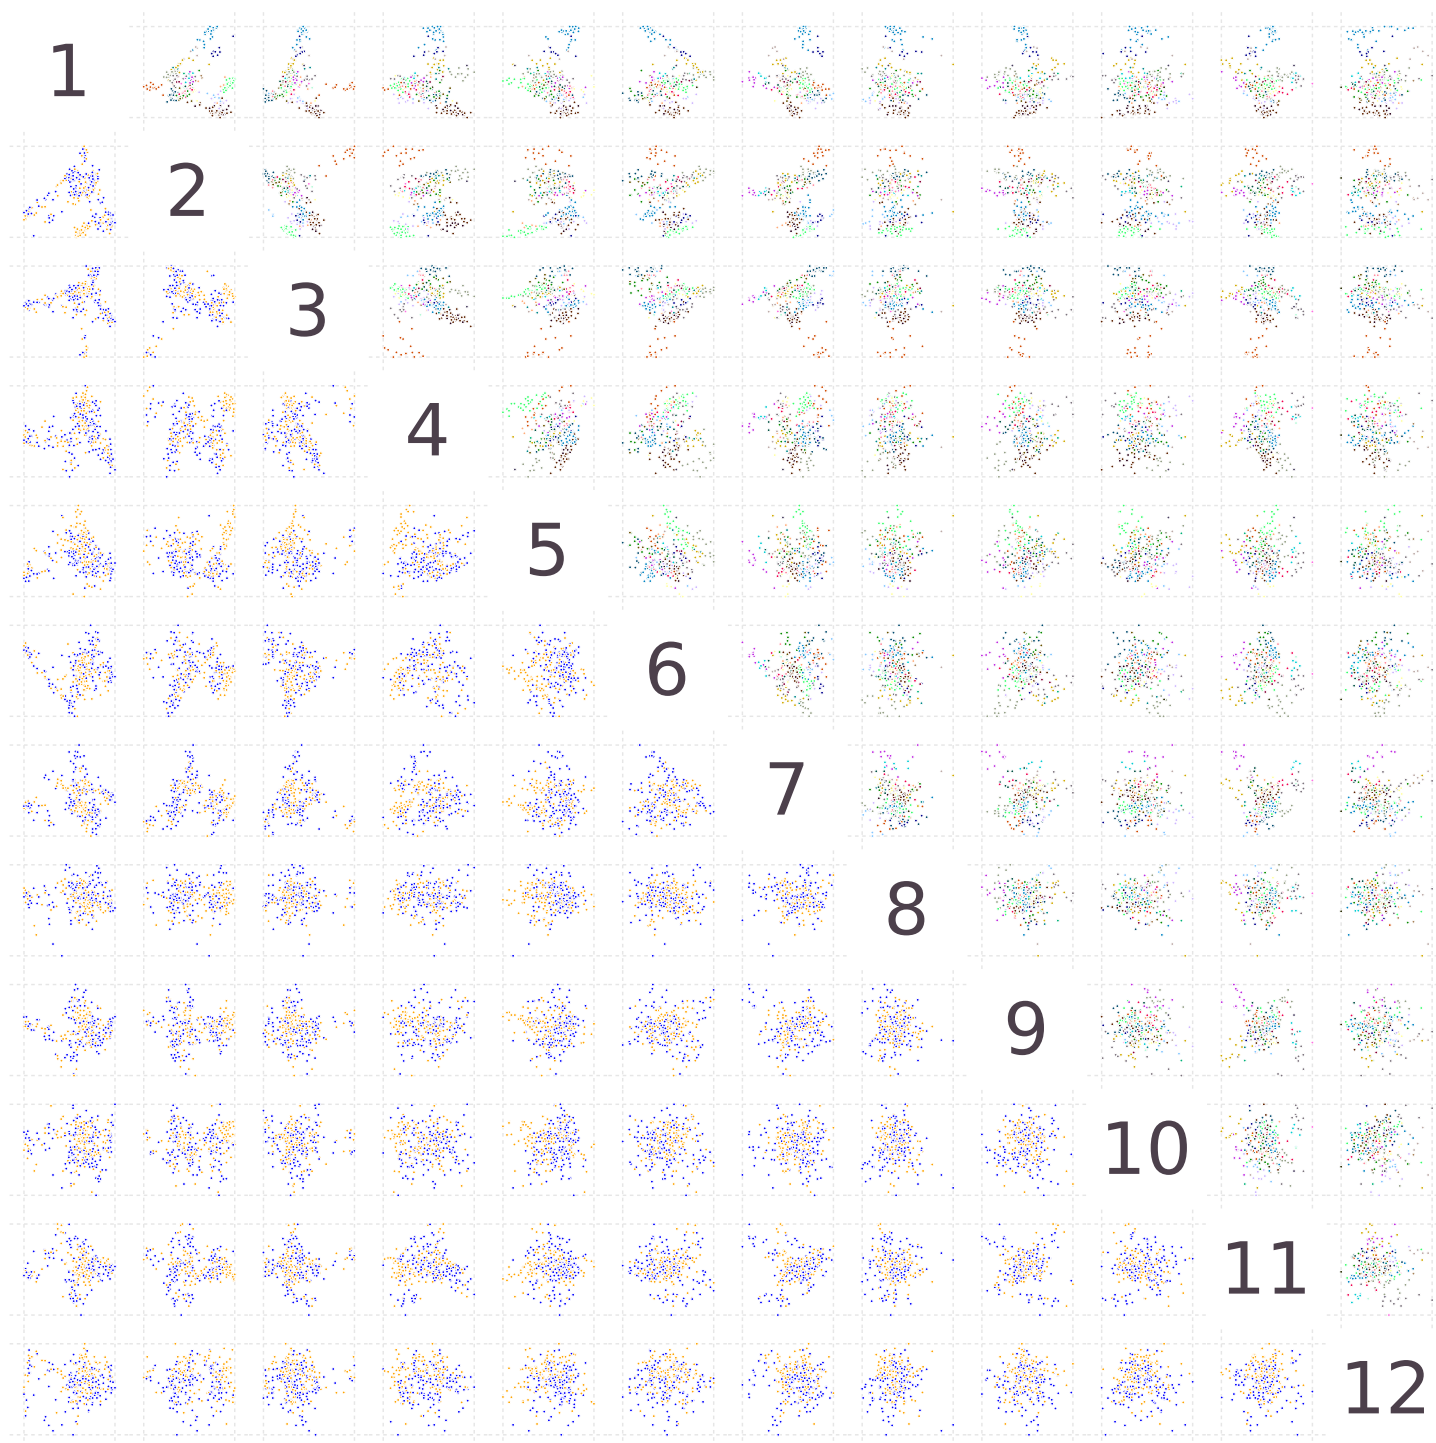

Supplementary Figure 2: SVD of the TCGA data set. Below the diagonal, samples are colored by 'xml\_gender', and above the diagonal, samples are colored by 'gdc\_cases\_tissue\_source\_site\_project'. (Color key given above.)

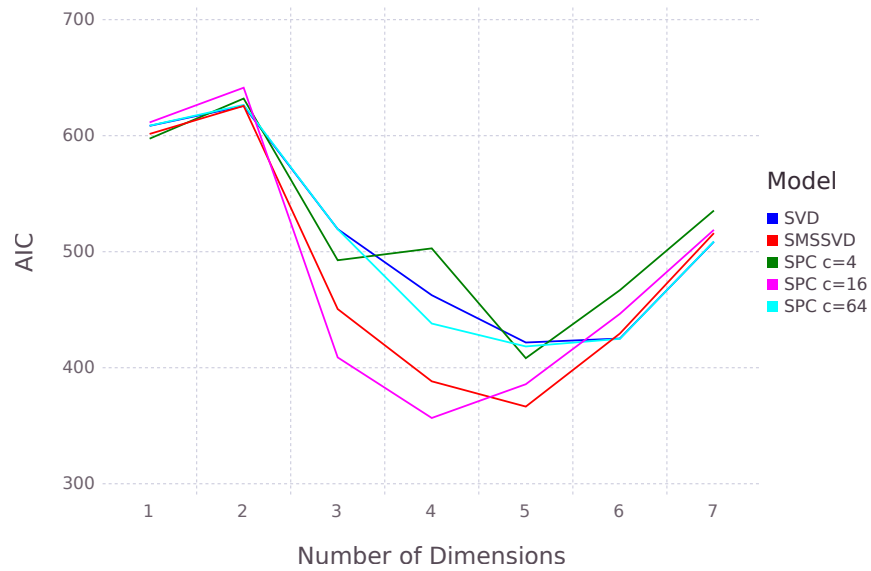

Supplementary Figure 3: Evaluation of SMSSVD on the Acute Lymphoblastic Leukemia (RNA-Seq) data set with subtype ‘Other’ included.

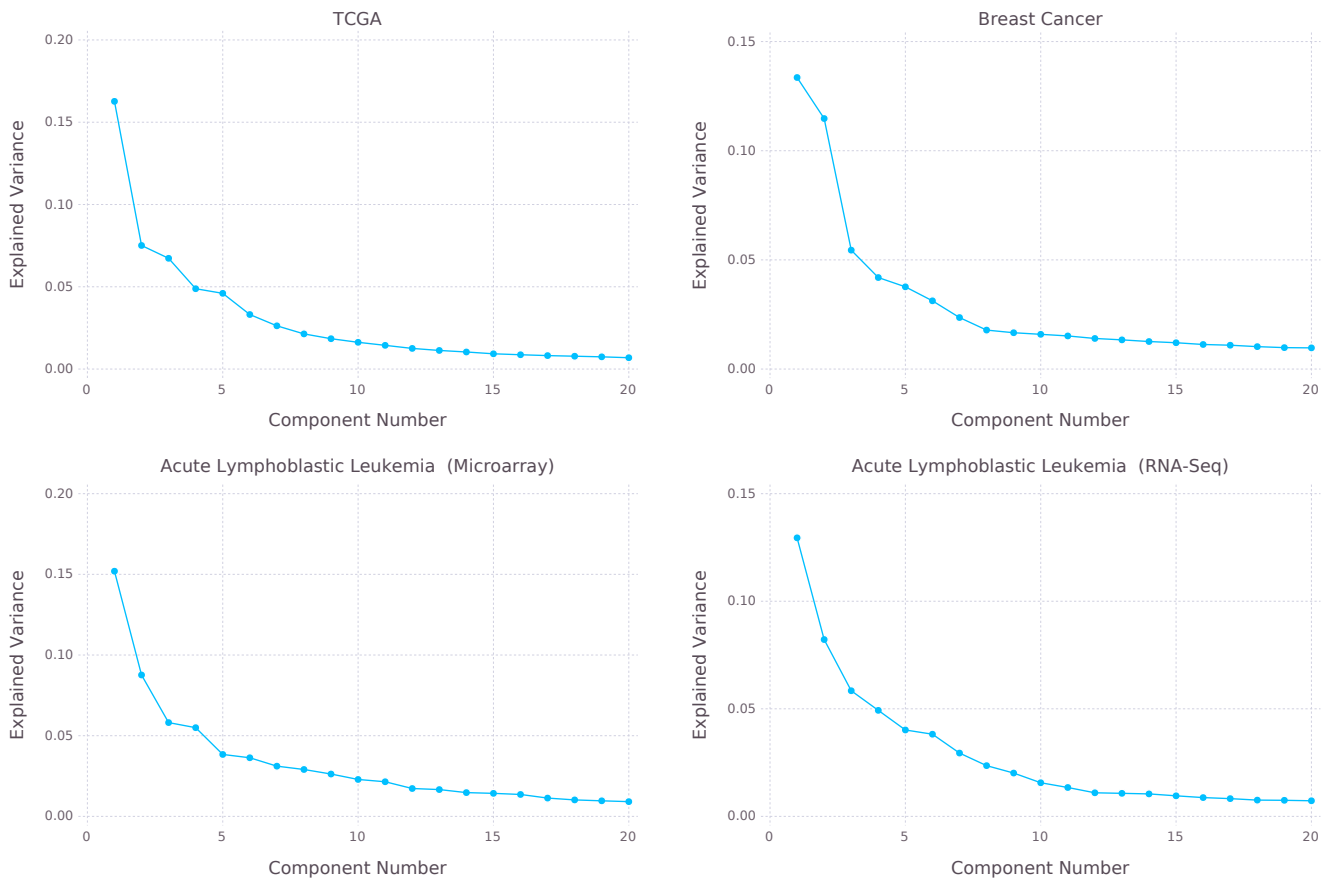

Supplementary Figure 4: Scree plots for the data sets in Figure 3.

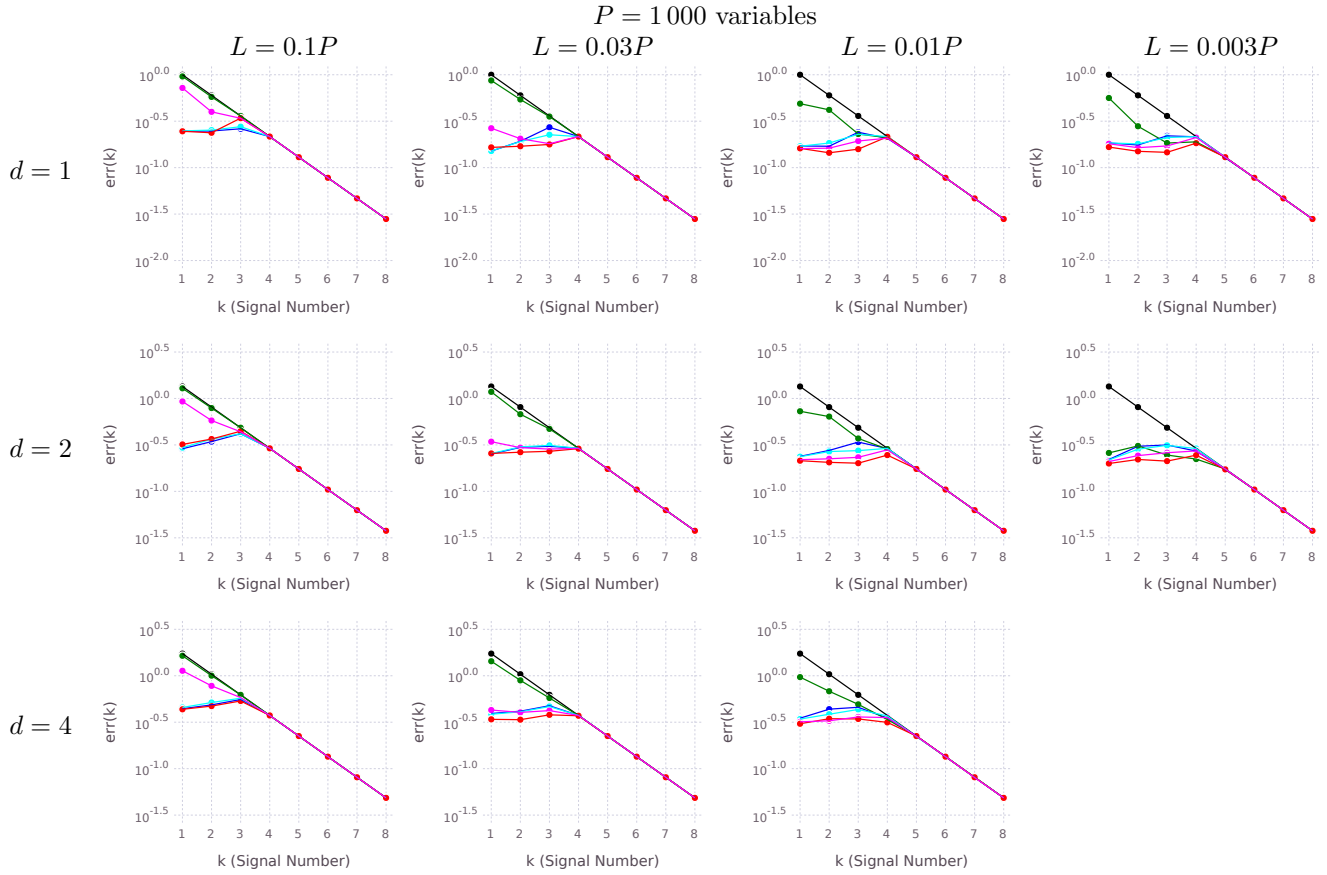

Supplementary Figure 5: The reconstruction error,  $\text{err}(k)$ , is shown for different conditions. The signal strength  $\|Y_k\|_F$  (black) is shown for scale. The methods are: SVD (blue), SMSSVD (red) and SPC (green, magenta, cyan) with decreasing degree of sparsity (regularization parameters  $c = 0.04\sqrt{P}$ ,  $c = 0.12\sqrt{P}$  and  $c = 0.36\sqrt{P}$  respectively). No errors larger than the signal strength are displayed as that indicates that a different signal has been found.
